# Supplementary material for: In vivo dendritic cell targeting cellular vaccine induces CD4+ Tfh cell-dependent antibody against influenza virus
Source: PubMed Central journal article supplement (PMC5064395; doi:10.1038/srep35173), 2016-10-14

**Supplemental Information**

***In vivo* dendritic cell targeting cellular vaccine induces CD4<sup>+</sup> Tfh cell-dependent antibody against influenza virus**

Satoru Yamasaki, Kanako Shimizu, Kohei Kometani, Maki Sakurai, Masami Kawamura, and Shin-ichiro Fujii

### **Figure S1. Characterization of aAVC-OVA**

(a) aAVC-OVA were established using NIH3T3 as vector cells by co-electroporation with OVA and CD1d mRNA and loading with  $\alpha$ -GalCer. Eight hours after electroporation, CD1d expression (Red, aAVC-OVA; Black, isotype) (b) and the amount of OVA protein (ng/5x10<sup>5</sup> cells) (c) were assessed by flow cytometry and ELISA (ITEA Inc.), respectively. In addition, the NKT cell stimulating capacity of aAVC-OVA was examined by co-culturing with the V $\alpha$ 14 iNKT cell hybridoma 1.2 [kindly provided by Dr. M. Kronenberg (La Jolla Inst., La Jolla, CA)] or spleen cells and measuring IL-2 (d) or IFN- $\gamma$  production (e), respectively.

### **Figure S2. Serum anti-OVA antibody titers induced by vaccination with alum plus OVA protein**

Serum IgG1 (a) and IgG2b (b) anti-OVA antibody levels were assessed by ELISA at 2 weeks after immunization with alum plus graded doses of OVA protein (1, 10, or 100  $\mu$ g) i.p. (Mean  $\pm$  SEM, n=5)

### **Figure S3. Effector CD4 T cells induced by aAVC or other vaccine formulations**

(a, b) C57BL/6 mice were transferred with 1 x 10<sup>5</sup> OT-II cells and then injected i.p. with

alum plus 100  $\mu\text{g}$  OVA protein, 500 ng  $\alpha\text{-GalCer}$  plus 100  $\mu\text{g}$  OVA, or  $5 \times 10^5$  aAVC-OVA i.v. 24h later. One week after an immunization, spleen cells were isolated and the frequency (left) and absolute number (right) of OT-II cells in the vaccinated mice were analyzed using CD45.1-FITC and CD4-APC. (Mean  $\pm$ SEM, n=4) \* $P$ <0.05, \*\* $P$ <0.01. (c) As shown in (a), but spleen cells from each group of mice were stimulated with OVA peptide *in vitro* for 6h and cytokine production by OT-II cells was analyzed by intracellular cytokine staining using IFN- $\gamma$ -APC and IL-2-PE or IL-4-APC and IL-10-PE after gating on CD45.1<sup>+</sup>CD4<sup>+</sup> cells.

#### **Figure S4. The frequency of CD4<sup>+</sup> Tfh cells in aAVC-OVA-immunized mice**

(a, b) WT mice were immunized with aAVC-OVA. Five days later, the frequency of Tfh cells among CD4<sup>+</sup> T cells in spleen was analyzed using CD4-PerCP/Cy5.5, PD1-VB, and CXCR5-APC. (Mean  $\pm$ SEM, n=5-6) \* $P$ <0.05.

#### **Figure S5. Two components of aAVC-OVA for an induction of CD4<sup>+</sup> Tfh**

C57BL/6 mice were transferred with  $1 \times 10^5$  OT-II cells and then immunized with  $5 \times 10^5$  CD1d-NIH3T3/Gal (aAVC without OVA), CD1d-NIH3T3-OVA (aAVC without  $\alpha\text{-GalCer}$ ) and aAVC-OVA 24 h later. The total number of OT-II cells (a) and OT-II<sup>+</sup> Tfh

cells (b) were assessed 5 days after immunization. (Mean  $\pm$  SEM, n=4) \* $P$ <0.05,

\*\*\* $P$ <0.001.

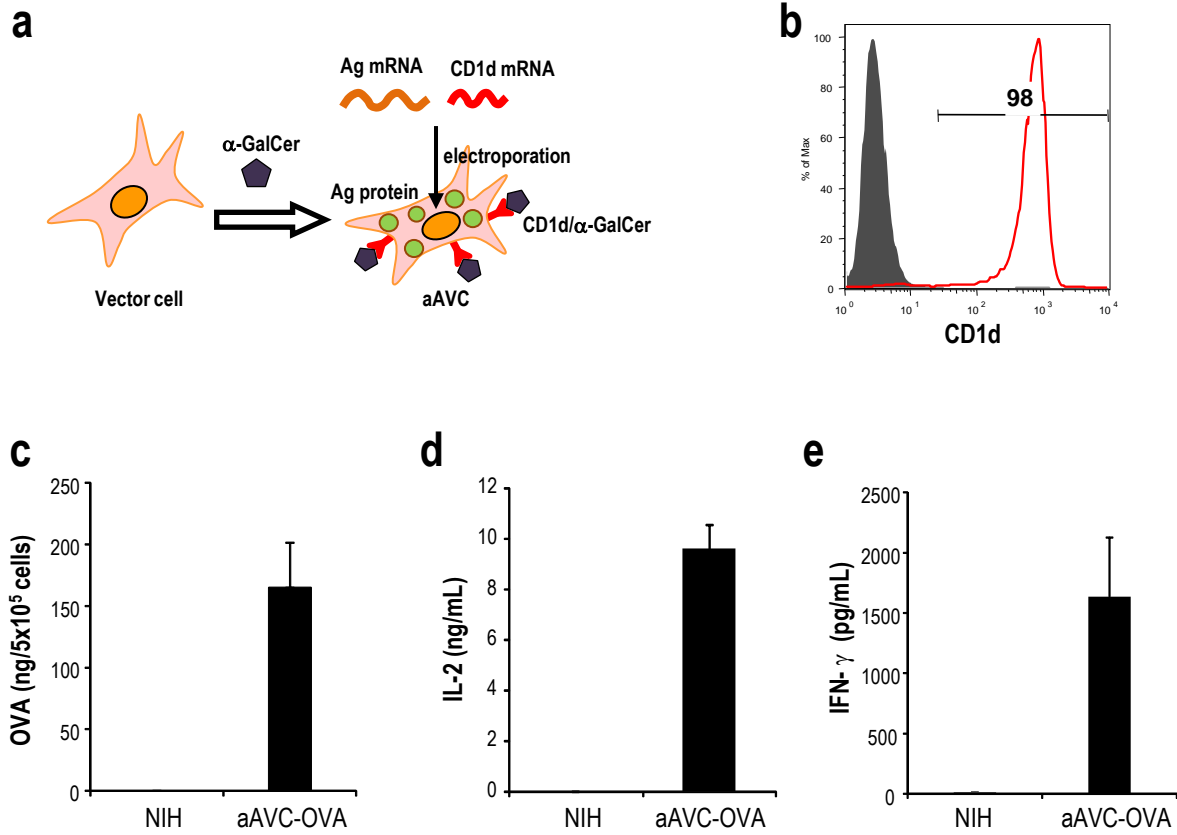

**a**

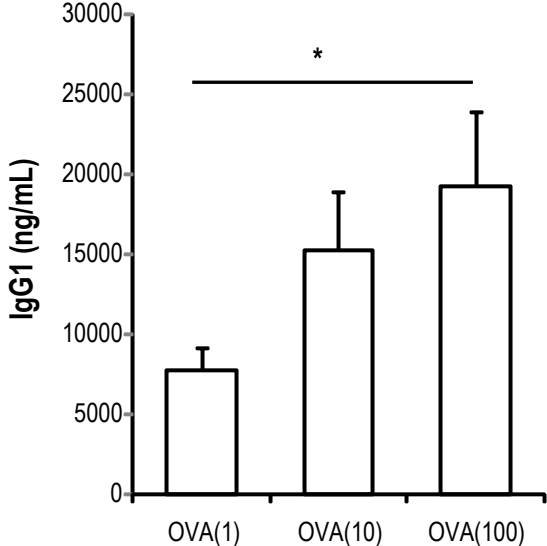

**b**

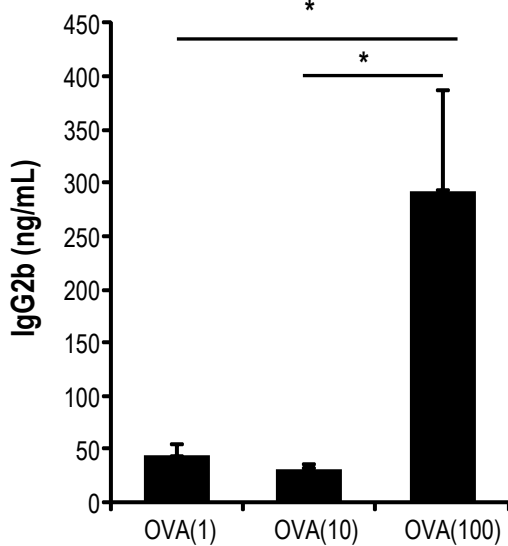

**a**

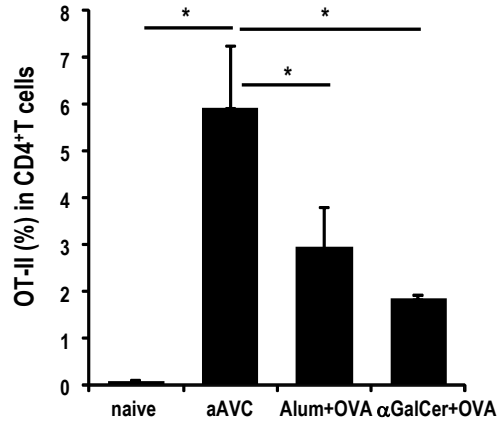

**b**

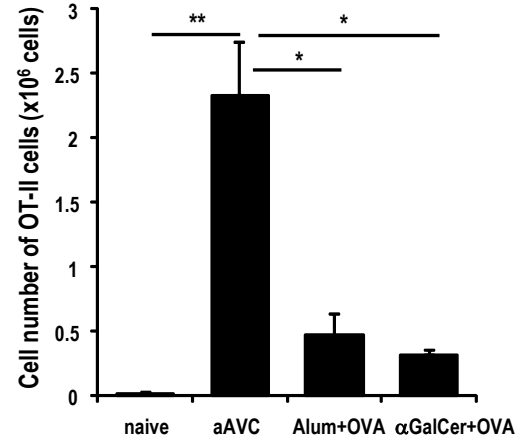

**C**

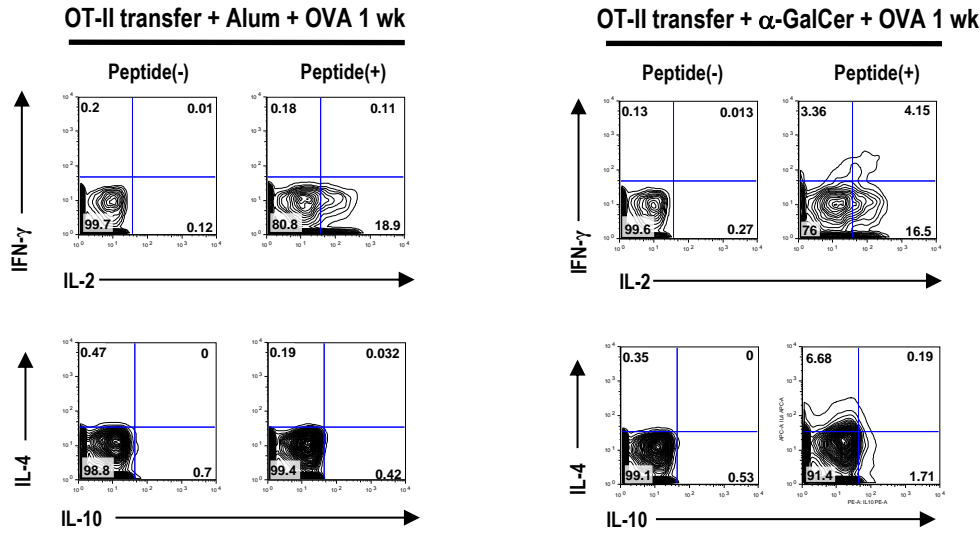

Figure S4

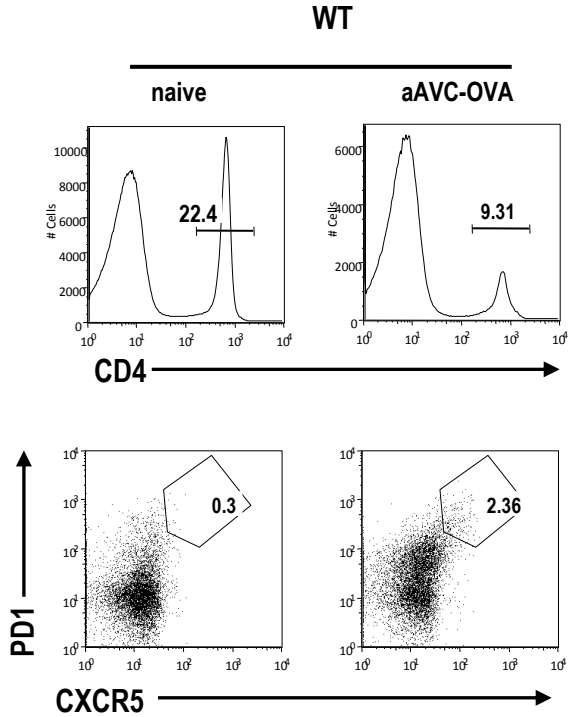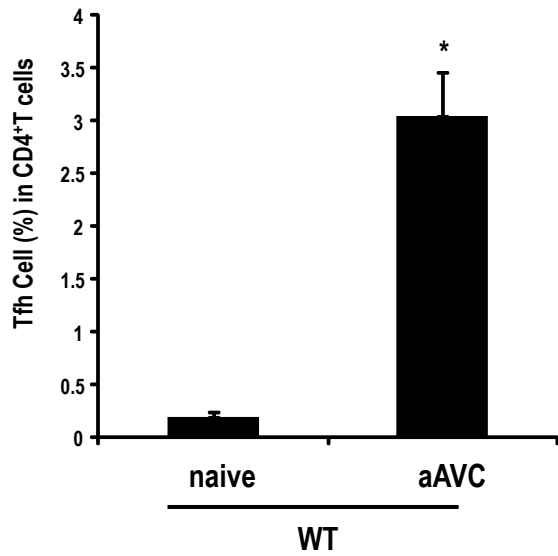



a

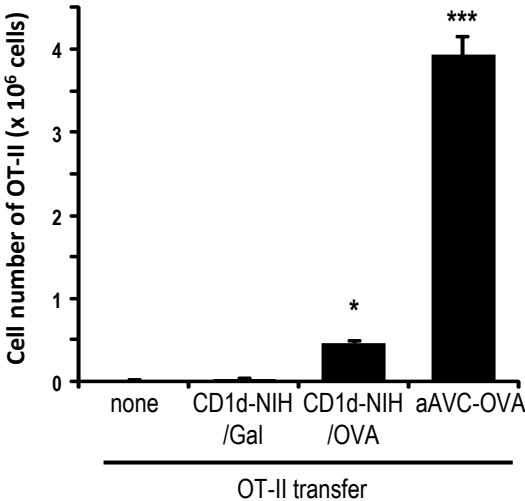

b

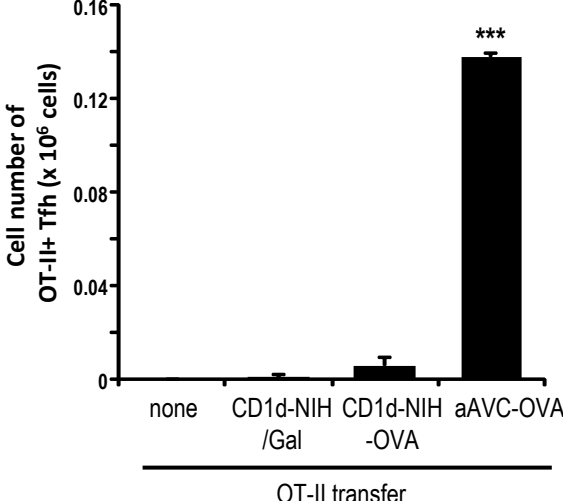

Supplement: srep35173-s1.pdf [file srep35173-s1.pdf]
